# Supplementary material for: European Headache Federation (EHF) critical re-appraisal and meta-analysis of oral drugs in migraine prevention—part 1: amitriptyline
Source: PubMed Central journal article supplement (PMC10088191; doi:10.1186/s10194-023-01573-6), 2023-04-11

**Supplement 1: Sensitivity analysis using the Paule-Mandel heterogeneity estimator**  
 50% or more reduction in monthly migraine days

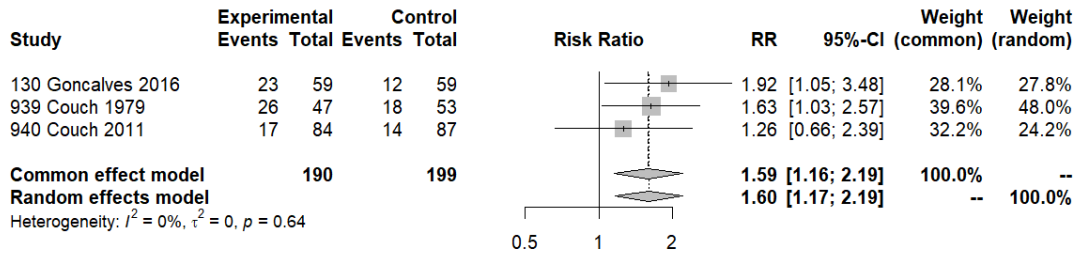

Adverse events leading to discontinuation

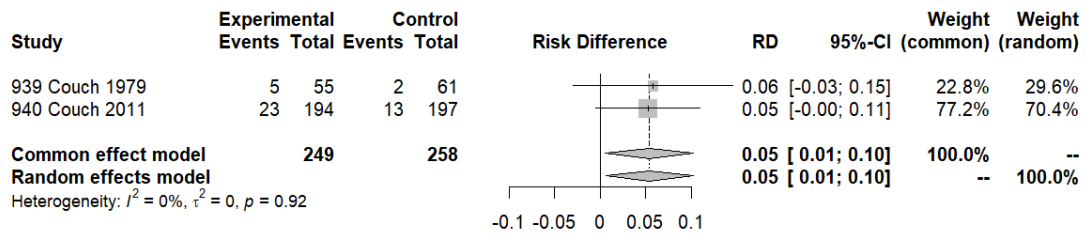

Supplement: 10194_2023_1573_MOESM2_ESM.pdf [file 10194_2023_1573_MOESM2_ESM.pdf]
